# Supplementary material
Source: publisher figshare collection journal article supplement (https://frontiersin.figshare.com/ndownloader/files/14500682)

# **Supplementary Materials**

## **Enhanced Anaerobic Biodegradation of Benzoate under Sulfate-reducing Conditions with Conductive Iron-oxides in Sediment of Pearl River Estuary**

**Li Zhuang<sup>1</sup>, Ziyang Tang<sup>2</sup>, Jinlian Ma<sup>2</sup>, Zhen Yu<sup>2</sup>, Yueqiang Wang<sup>2</sup>, Jia Tang<sup>2\*</sup>**

**Running title: Enhanced benzoate degradation under sulfate-reducing conditions by iron oxides**

Correspondence:

Jia Tang [tangjia@soil.gd.cn](mailto:tangjia@soil.gd.cn)

Table S1: Contribution of microbial Fe(III) reduction to benzoate degradation

| Treatment         | feeding cycle   | benzoate degraded (mM) | electrons produced from benzoate oxidation (mmol) | Fe(III) reduced (mM) | electrons consumed by Fe(III) reduction (mmol) | Electron recovery by Fe(III) reduction |
|-------------------|-----------------|------------------------|---------------------------------------------------|----------------------|------------------------------------------------|----------------------------------------|
| Magnetite-amended | 1 <sup>st</sup> | 2.32                   | 69.6                                              | 7.5                  | 7.5                                            | 11%                                    |
|                   | 2 <sup>nd</sup> | 2.36                   | 70.8                                              | 1.6                  | 1.6                                            | 2%                                     |
| Hematite-amended  | 1 <sup>st</sup> | 2.31                   | 69.3                                              | 7.0                  | 7.0                                            | 10%                                    |
|                   | 2 <sup>nd</sup> | 2.46                   | 73.8                                              | 1.6                  | 1.6                                            | 2%                                     |

**Figure S1** Fe(II) produced from microbial reduction of magnetite or hematite in the absence and presence of sulfate

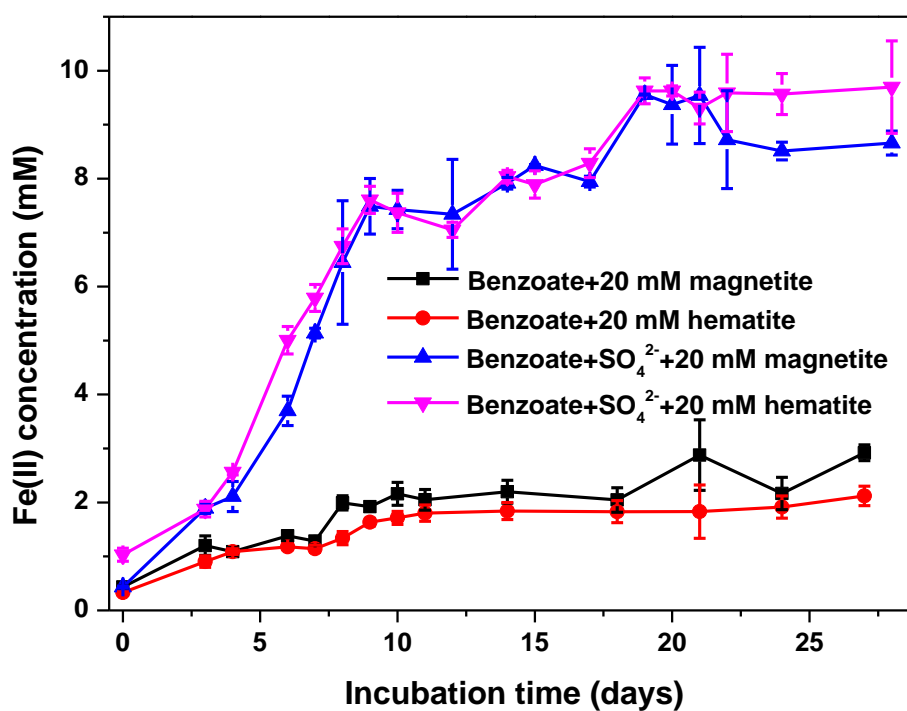

**Figure S2** A hypothetical scheme showing DIET-facilitated benzoate degradation under sulfate-reducing conditions

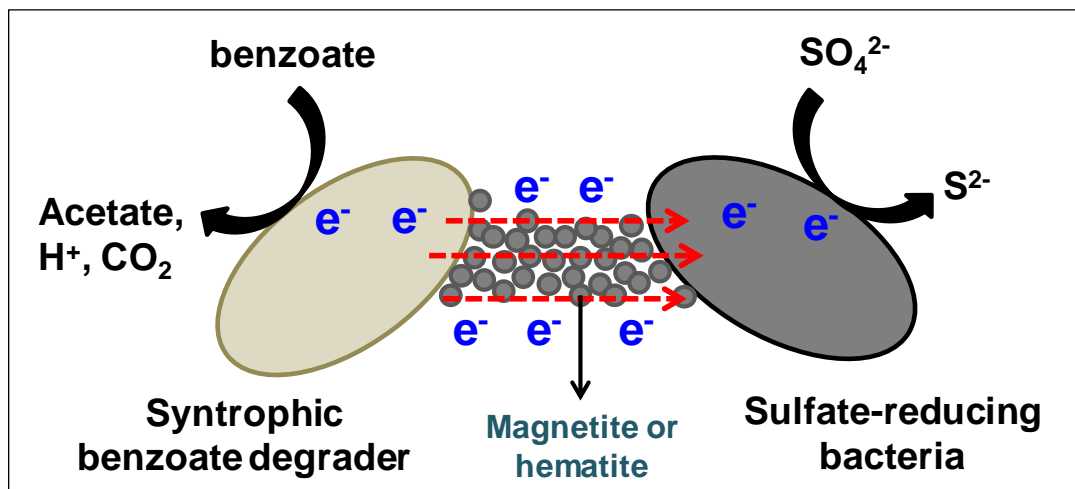

**Figure S3** A hypothetical scheme showing DIET-facilitated acetate degradation under sulfate-reducing conditions

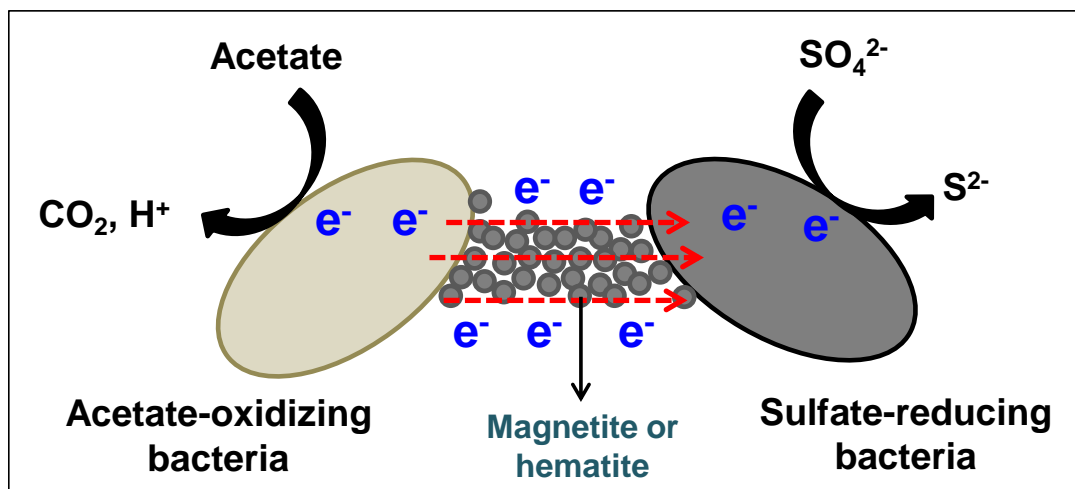

Supplement: Supplementary file [file 14500682]
